# Supplementary material
Source: Elsevier journal article supplement (https://www.sciencedirect.com/science/article/pii/S0924424721002673)
Supplement: mmc1 [file 1-s2.0-S0924424721002673-mmc1.docx]

**Electronic Supplementary Material**

for

**Heterostructure-Based Devices with Enhanced Humidity Stability for H2 Gas Sensing Applications in Breath Tests and Portable Batteries**

Oleg Lupan,**a,b,*** Nicolai Ababii,**b** Abhishek Kumar Mishra,**c,*** Mani Teja Bodduluri,**d,** Nicolae Magariu,**b**

Alexander Vahl,**e** Helge Krüger,**a** Bernhard Wagner,**d** Franz Faupel,**e**

Rainer Adelung,**a,*** Nora H. de Leeuw,**f,g,*** Sandra Hansen**a,***

**a** *Institute for Materials Science, Chair for Functional Nanomaterials, Faculty of Engineering, Kiel, Kaiserstraße 2, D-24143 Kiel, Germany*

**b** *Center for Nanotechnology & Nanosensors, Department of Microelectronics & Biomedical Engineering, Faculty CIM, Technical University of Moldova, 168 Stefan cel Mare str., MD-2004, Chisinau, Republic of Moldova*

**c** *School of Engineering, Department of Physics, University of Petroleum and Energy Studies, Bidholi via Premnagar, Dehradun 248007, India*

**d** *Institute for Materials Science, Chair for Materials and Processes for Nanosystem Technologies, Christian-Albrechts-University of Kiel, Kaiser str. 2, D 24143, Kiel, Germany*

**e** *Institute for Materials Science, Chair for Multicomponent Materials, Faculty of Engineering, Kiel, Kaiserstraße 2, D-24143 Kiel, Germany*

**f** *School of Chemistry, University of Leeds, Leeds LS2 9JT, United Kingdom*

**g** *School of Earth Sciences, Utrecht University, Princetonlaan 8a, 3584 CB Utrecht, The Netherlands*

*Corresponding authors

Prof. Dr. Lupan, Prof. Dr. Adelung Prof. Dr. de Leeuw Dr. Hansen

E-mails: [ollu@tf.uni-kiel.de](mailto:ollu@tf.uni-kiel.de) [ra@tf.uni-kiel.de](mailto:ra@tf.uni-kiel.de) [n.h.deleeuw@leeds.ac.uk](mailto:n.h.deleeuw@leeds.ac.uk) [sn@tf.uni-kiel.de](mailto:sn@tf.uni-kiel.de)

oleg.lupan@mib.utm.md

Prof. Dr. Mishra

[akmishra@ddn.upes.ac.in](mailto:akmishra@ddn.upes.ac.in)

**Keywords:** humidity stability, H2 gas sensing, heterostructures, Al2O3/CuO, DFT


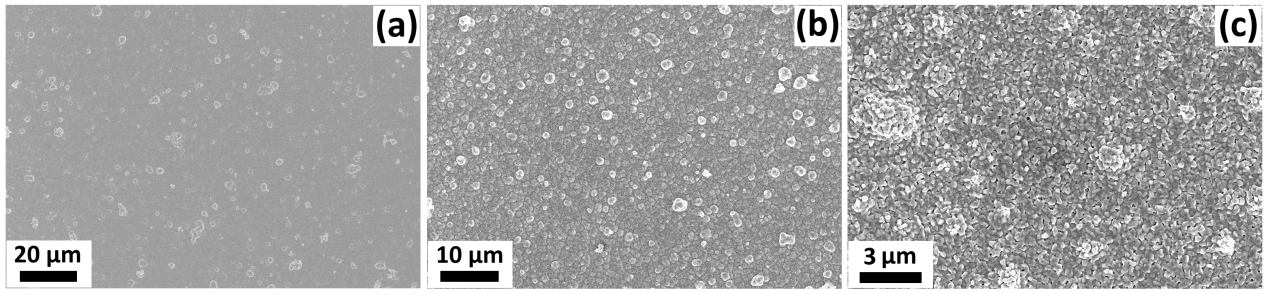


**Figure S1**. Large view of SEM images of (6 nm Al2O3)/CuO heterostructures thermal annealing at 600 °C for 30 min at different magnifications: (a)20 µm; (b) 10 µm; and (c) 3 µm.


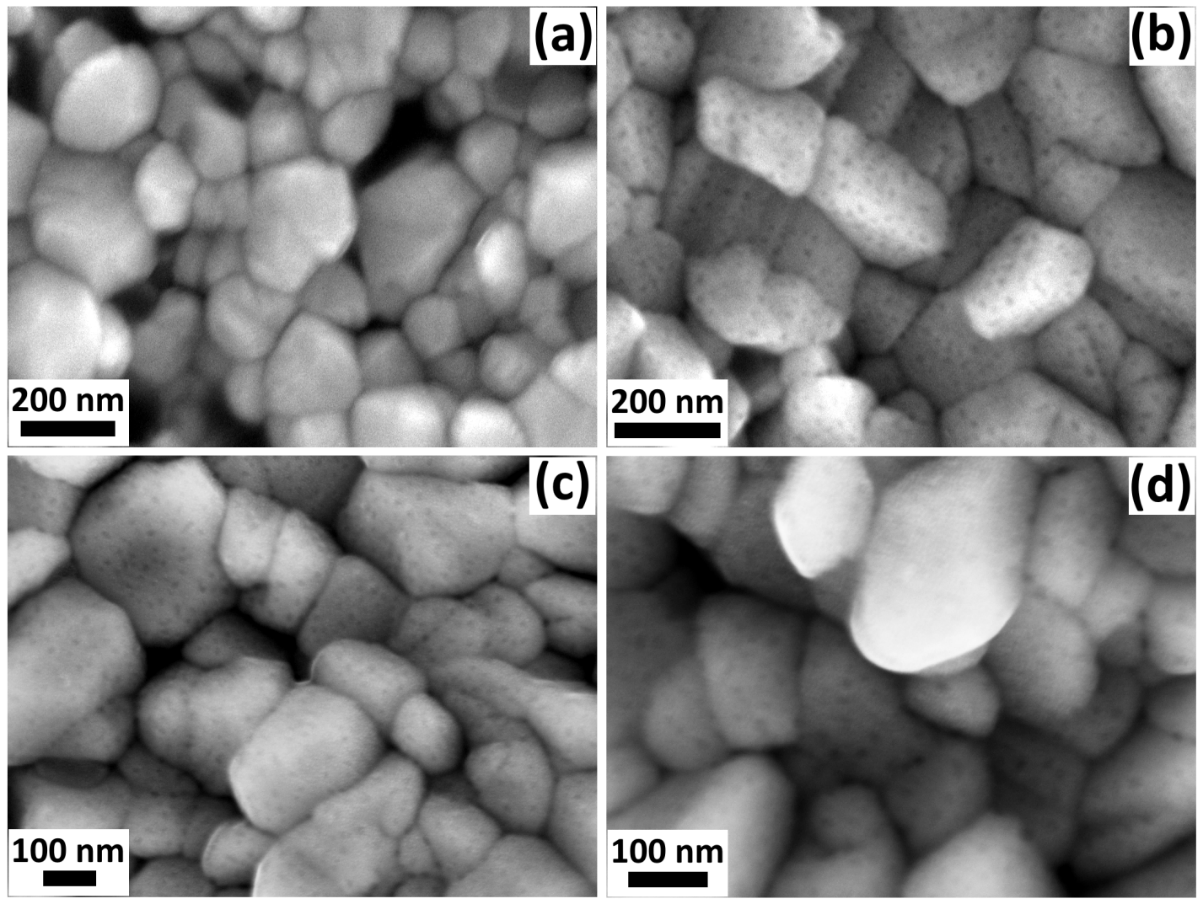


**Figure S2**. SEM images of (6 nm Al2O3)/CuO heterostructures: (a) as-grown; and at different magnifications after thermal annealing at 600 °C for 30 min:(b) 200 nm; (c) 100 nm; and (d) 100 nm.


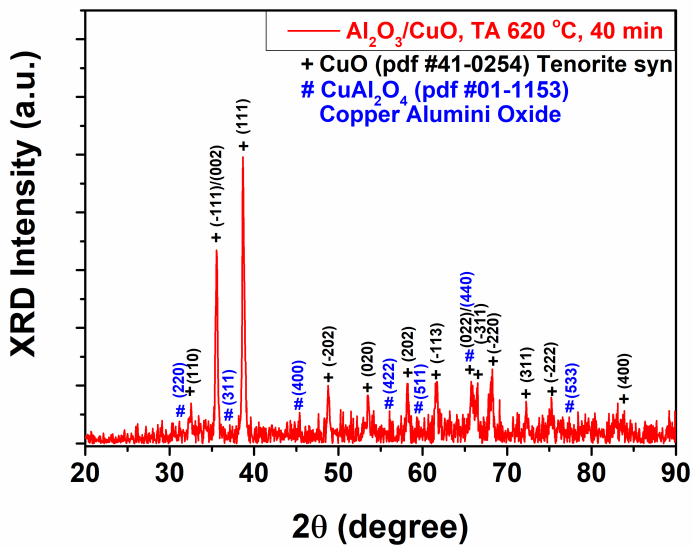


**Figure S3**. XRD patterns of (15 nm Al2O3)/CuO heterostructures with thermal annealing at 620 °C for 40 min.


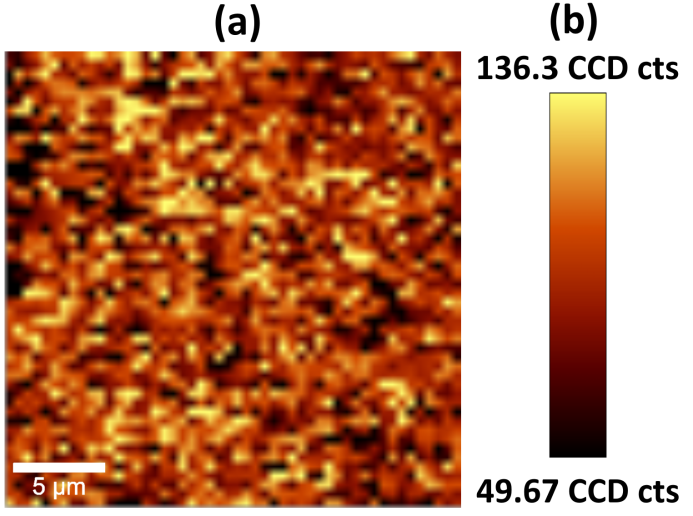


**Figure S4**. Raman mapping of the *A*g mode (281 cm-1) for CuAl2O4/CuO heterojunctions and TA at 600 °C in air for 30 min.


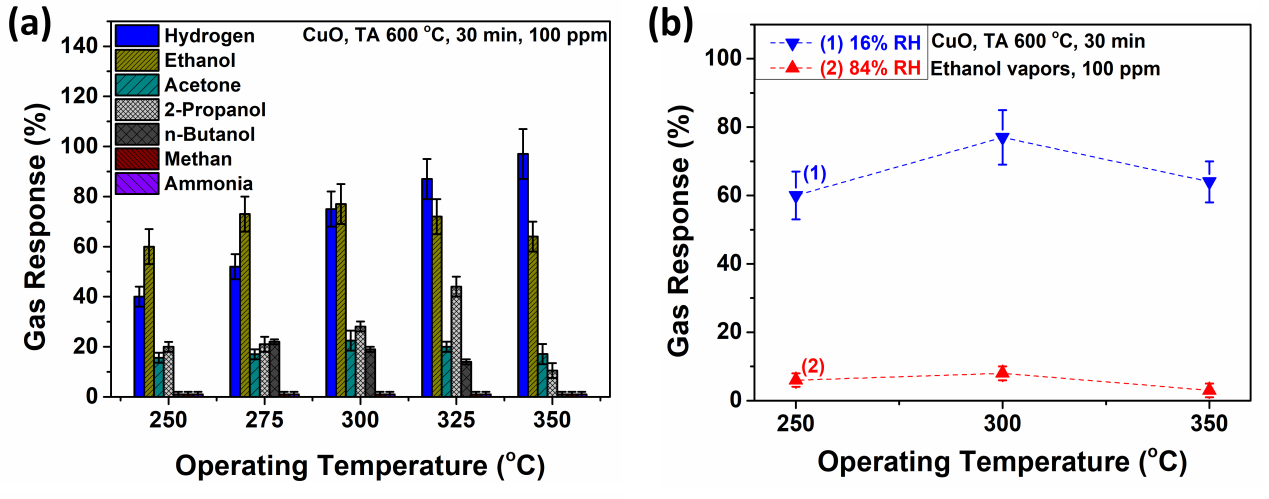


**Figure S5**. (a)Gas response to various gases (100 ppm) of CuO nanostructures with thermal annealing at 600 °C for 30 min. (b) Response to ethanol vapors versus operating temperatures for low and high relative humidity.


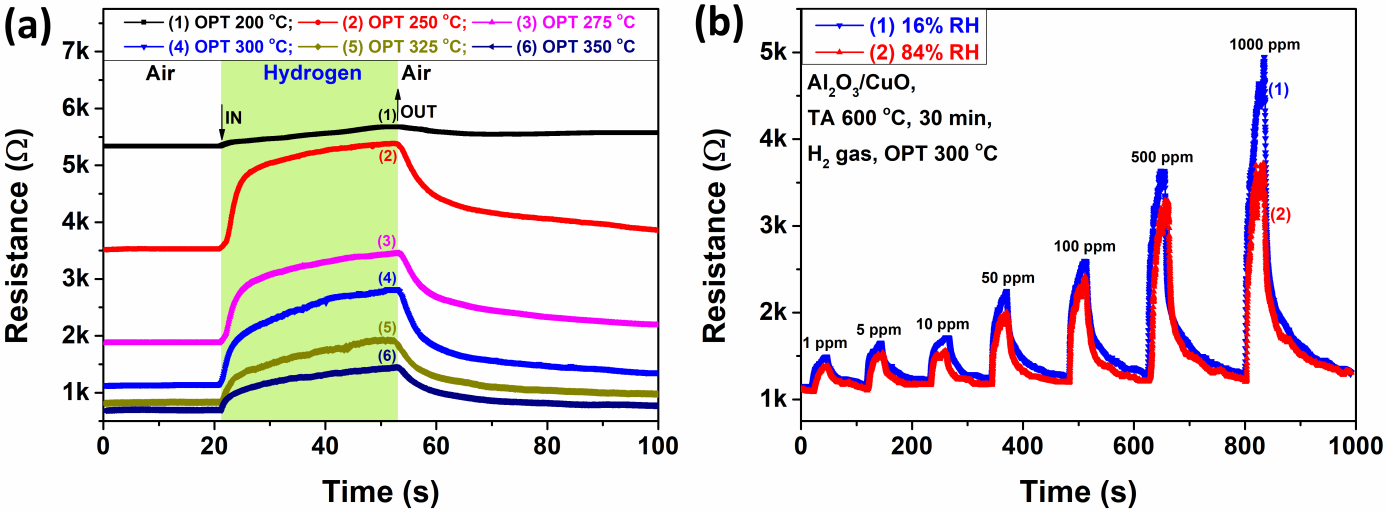


**Figure S6**. (a) Dynamic gas response to 100 ppm of H2 gas various work temperatures of (6 nm Al2O3)/CuO heterostructures with TA at 600 °C for 30 min. (b) Dynamic response to multiple concentrations of hydrogen (1, 5, 10, 50, 100, 500 and 1000 ppm) and work temperature of 300 °C of (6 nm Al2O3)/CuO heterostructures treatment annealing at 600 °C for 30 min for low and high relative humidity.


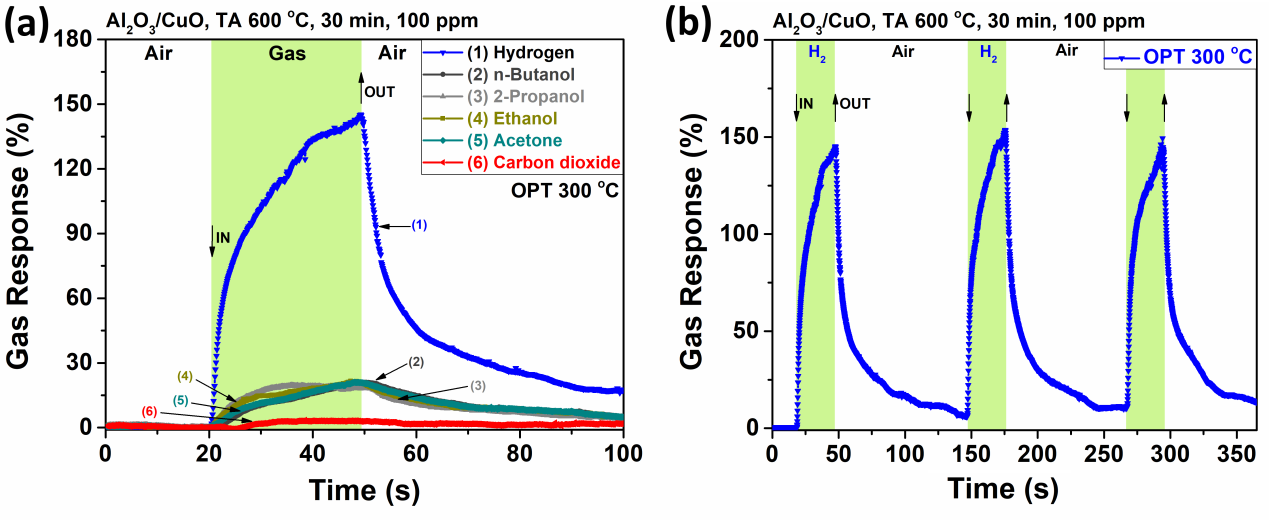


**Figure S7**. (a)The dynamic response to different types of gases or vapors at operating temperature of 300 °C of (6 nm Al2O3)/CuO heterostructures with thermal annealing at 600 oC for 30 min; (b) The dynamic response with three consecutive pulses to hydrogen with 100 ppm gas concentration at operating temperatures of 300 °C of (6 nm Al2O3)/CuO heterostructures with thermal annealing at 600 °C for 30 min.


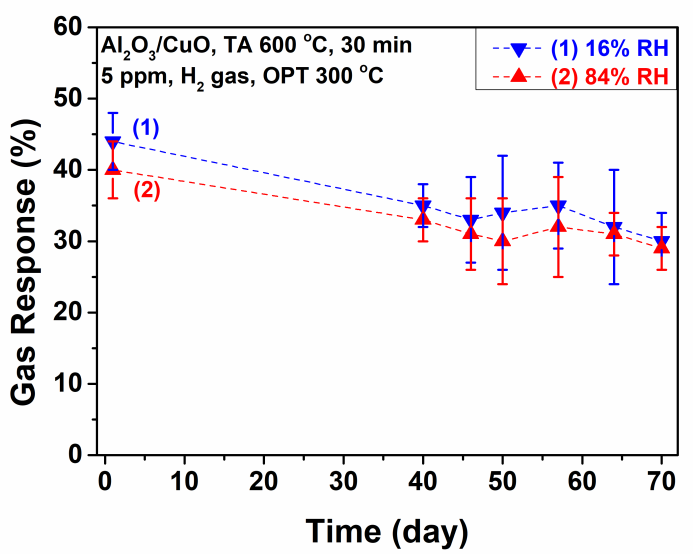


**Figure S8**. The long-term stability of (6 nm Al2O3)/CuO heterostructures for low and high relative humidity and the response to H2 gas with concentrations of 5 ppm.


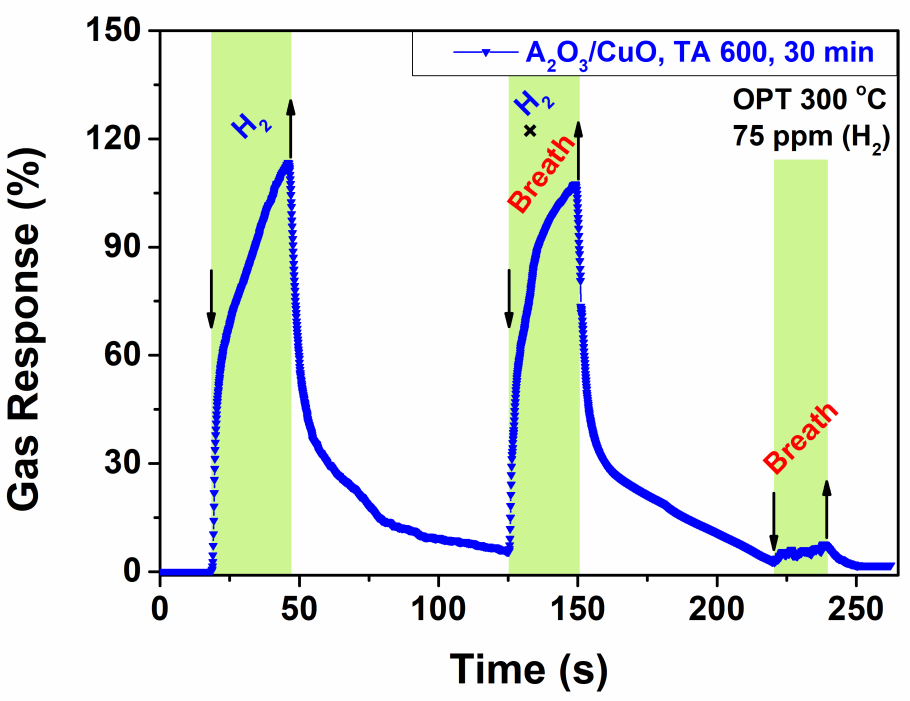


**Figure S9**. The influence of breath on the hydrogen response: first pulse – hydrogen gas; second pulse - hydrogen gas + breath; and third pulse – only breath.


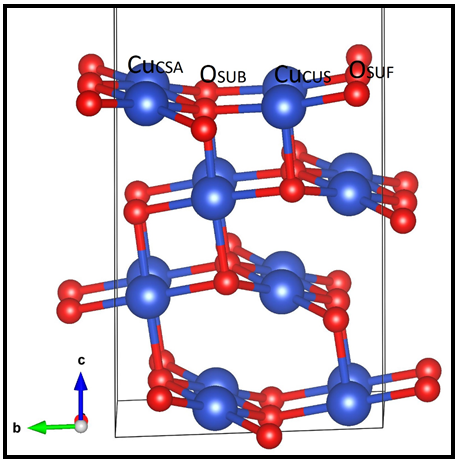


**Figure S10**. CuO(111) surface model with different copper and oxygen atoms marked. Blue and red colors indicate Cu and O atoms respectively.


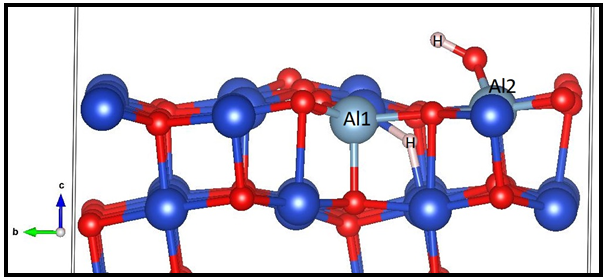


**Figure S11**. H2 molecule interaction with Al2O3-CuO (111) surface in a 2x2 supercell. Red color indicates O atoms, while light blue and dark blue colors indicate Al and Cu atoms and hydrogen atoms are represented by salmon pink colour.


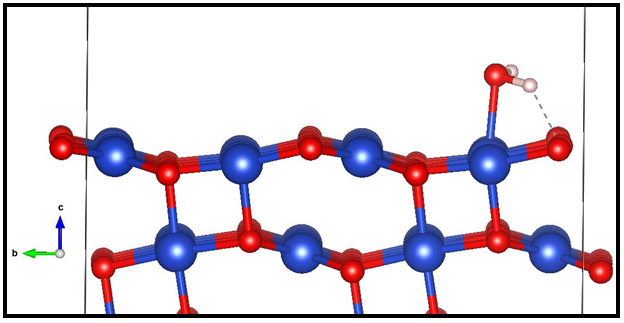


**Figure S12**. H2O molecule interaction with pristine CuO (111) surface. Red color indicates O atoms, while Cu atoms are indicated by dark blue color and hydrogen atoms are represented by salmon pink colour.

**Acknowledgment**

Federal Ministry of Education and Research by the project “PorSSi” (03XP0126 B) and the EKSH for supporting this research by “3D strukturierte Kohlenstoff-Schwefel Gerüstmaterialien als neuartiges und nachhaltiges Kathodenmaterial für Hochenergie Lithium-Ionen Akkus”. Additionally, the authors thank the WTSH and the EUSH for partially funding this project BAEW with (LPW-E/1.1.2/1486). This research was funded in parts by the DFG-Deutsche Forschungsgemeinschaft (German Research Foundation) under the schemes FOR 2093, AD 183/17-1 at Kiel University and SFB 986-TP-B1 and SCHU 926/25-1 at TUHH. Dr. Oleg Lupan acknowledges the Alexander von Humboldt Foundation for the research fellowship for experienced researchers (3-3MOL/1148833 STP) at the Institute for Materials Science, Kiel University, Germany. Dr. A.K. Mishra acknowledges University of Petroleum and Energy Studies, Dehradun. Via N. de Leeuw’s membership of the UK's HPC Materials Chemistry Consortium, which is funded by EPSRC (EP/L000202, EP/R029431), this work used the ARCHER UK National Supercomputing Service (<http://www.archer.ac.uk>). This research was sponsored in part by the NATO Science for Peace and Security Programme (SPS) under grant G5634 „Advanced Electro-Optical Chemical Sensors” AMOXES.
